# Supplementary material for: Multiple ancestral haplotypes harboring regulatory mutations cumulatively contribute to a QTL affecting chicken growth traits
Source: PubMed Central journal article supplement (PMC7455696; doi:10.1038/s42003-020-01199-3), 2020-08-28
Supplement: 42003_2020_1199_MOESM1_ESM.pdf [file 42003_2020_1199_MOESM1_ESM.pdf]

**Supplementary Information for “Multiple ancestral haplotypes harboring regulatory mutations cumulatively contribute to a QTL affecting chicken growth traits”**

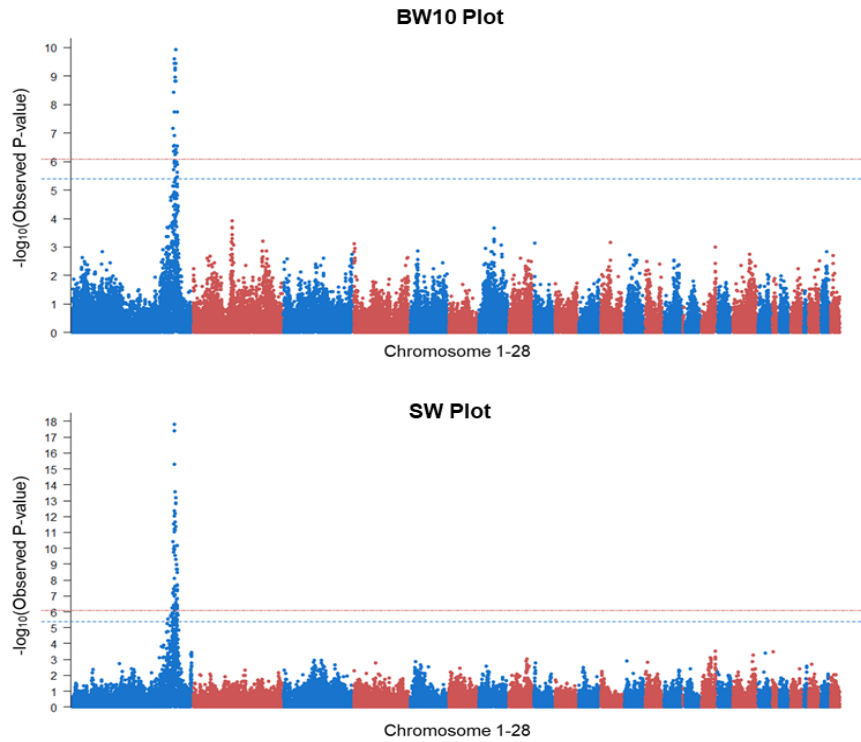

**Supplementary Fig. 1. Manhattan plots for GWAS of BW10 and SW in F<sub>2</sub> generation.** The GWAS results of BW10 and SW are displayed as  $-\log_{10}(P)$  values at the chromosomal position of all genome-wide tested SNPs. The horizontal red/blue lines indicate the genome-wide 1/5% significance thresholds ( $P$  values =  $8.12 \times 10^{-7}$ / $4.06 \times 10^{-6}$ ), respectively.

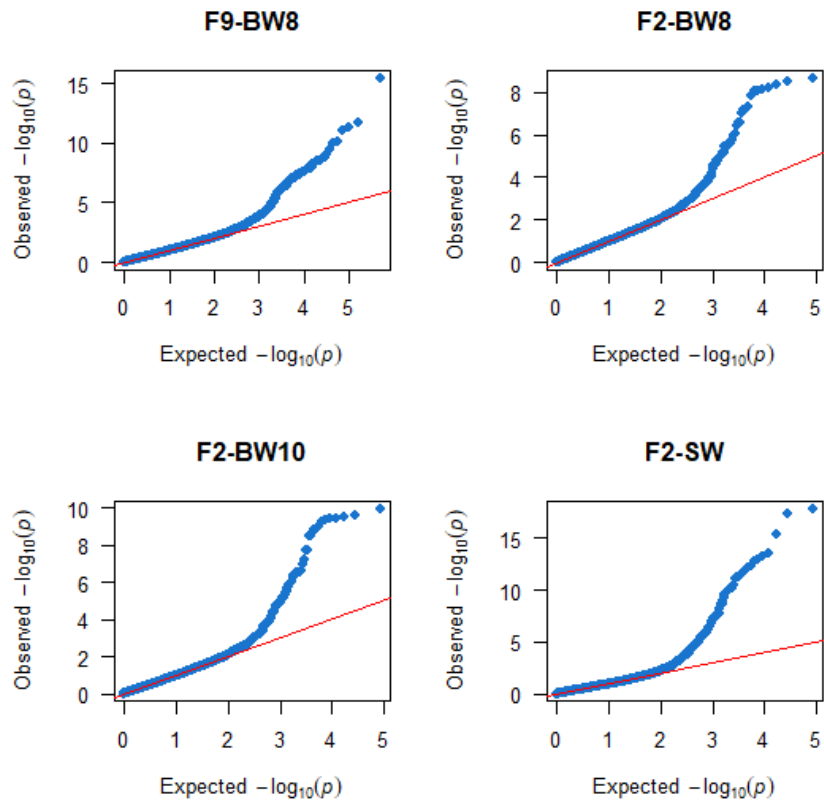

**Supplementary Fig. 2. Q-Q plots for the results from the genome wide association analyses.** The figures presented are for body weight (BW) and the combined weight of the ventriculus and the proventriculus (SW) in the F<sub>2</sub> and F<sub>9</sub> generations of the HB × HQLA deep intercross population.

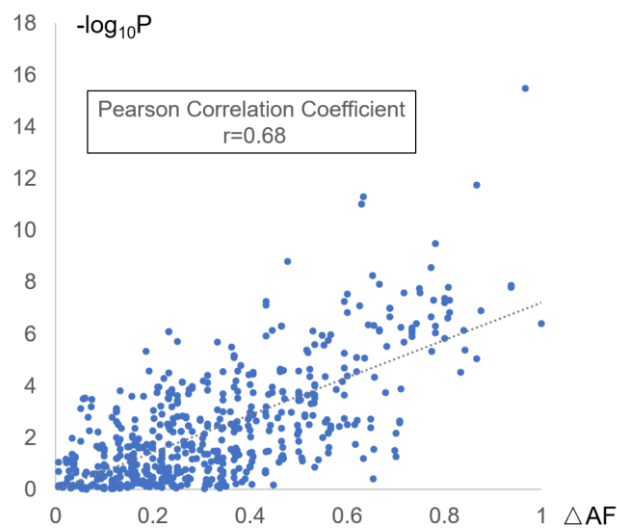

**Supplementary Fig. 3. Relationship between the allele-frequency differences of all SNPs in this QTL and the P value of association to BW8.** The  $\Delta AF$  between the HQLA and HB are displayed as  $-\log_{10}(P)$  values of 609 tested SNPs in 3.1 Mb QTL interval. The Pearson correlation coefficient was 0.68.

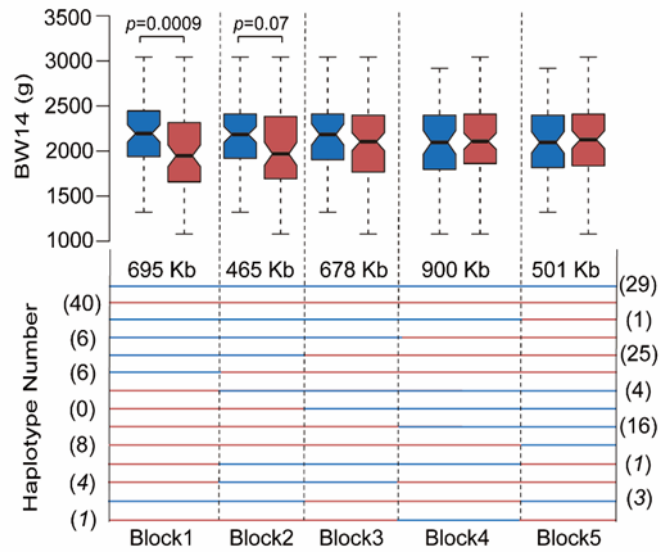

**Supplementary Fig. 4. Results from IBD-based fine-mapping analysis of the association region on Chromosome 1.** The top association region (GGA1 168.2-171.3 Mb) was fine-mapped using an IBD-based association analysis in the F<sub>9</sub> generation of the deep intercross population. Sub-regions IBD to HB and HQLA in the F<sub>0</sub> generation were identified. The seventy-two F<sub>9</sub> individuals (144 chromosomes) carried recombinant chromosomes from F<sub>0</sub> to F<sub>9</sub> were used in the analyses. Blue/red lines represent chromosome segments inherited from HQLA/HB, respectively. Significant association was found to block1 for body-weight at 2-weeks of age (BW14; P = 0.0009).

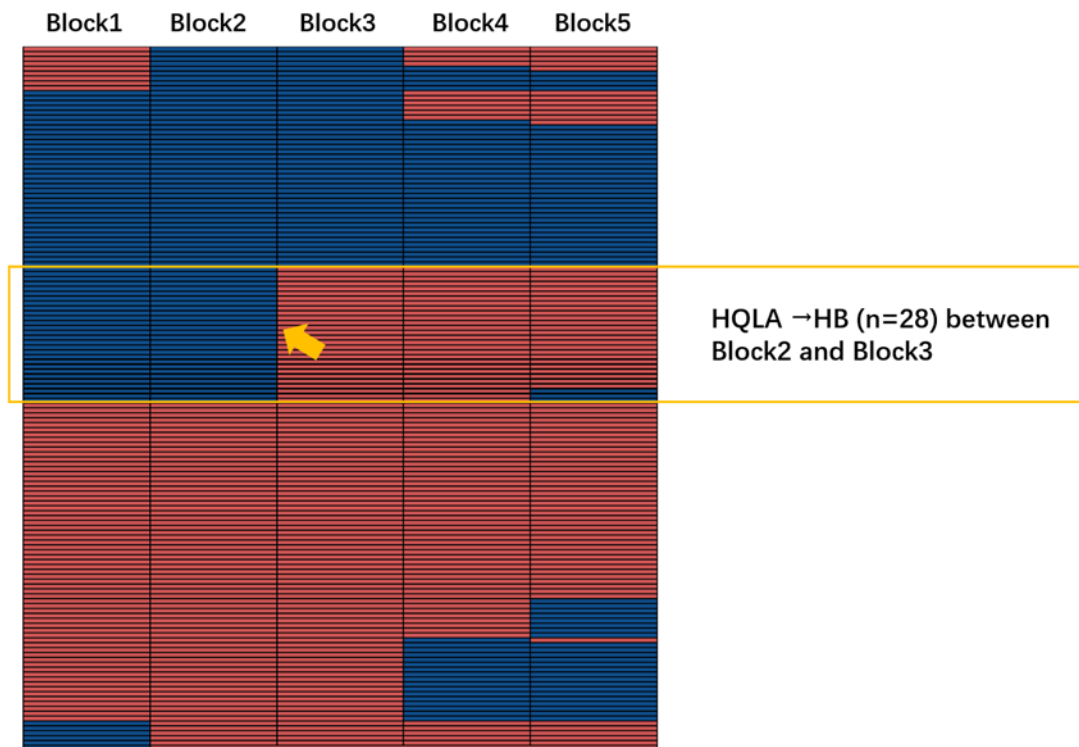

**Supplementary Fig. 5. Illustration of the founder-breed haplotypes across the five blocks in the 72 individuals (144 chromatids) carrying recombinant chromosomes in the region from 168.8 to 171.7 Mb on Chromosome 1. Blue/red lines represent chromosome segments inherited from the HQLA/HB. The only difference between Block2 and Block3 is the 28 chromatids converted from HQLA to HB.**

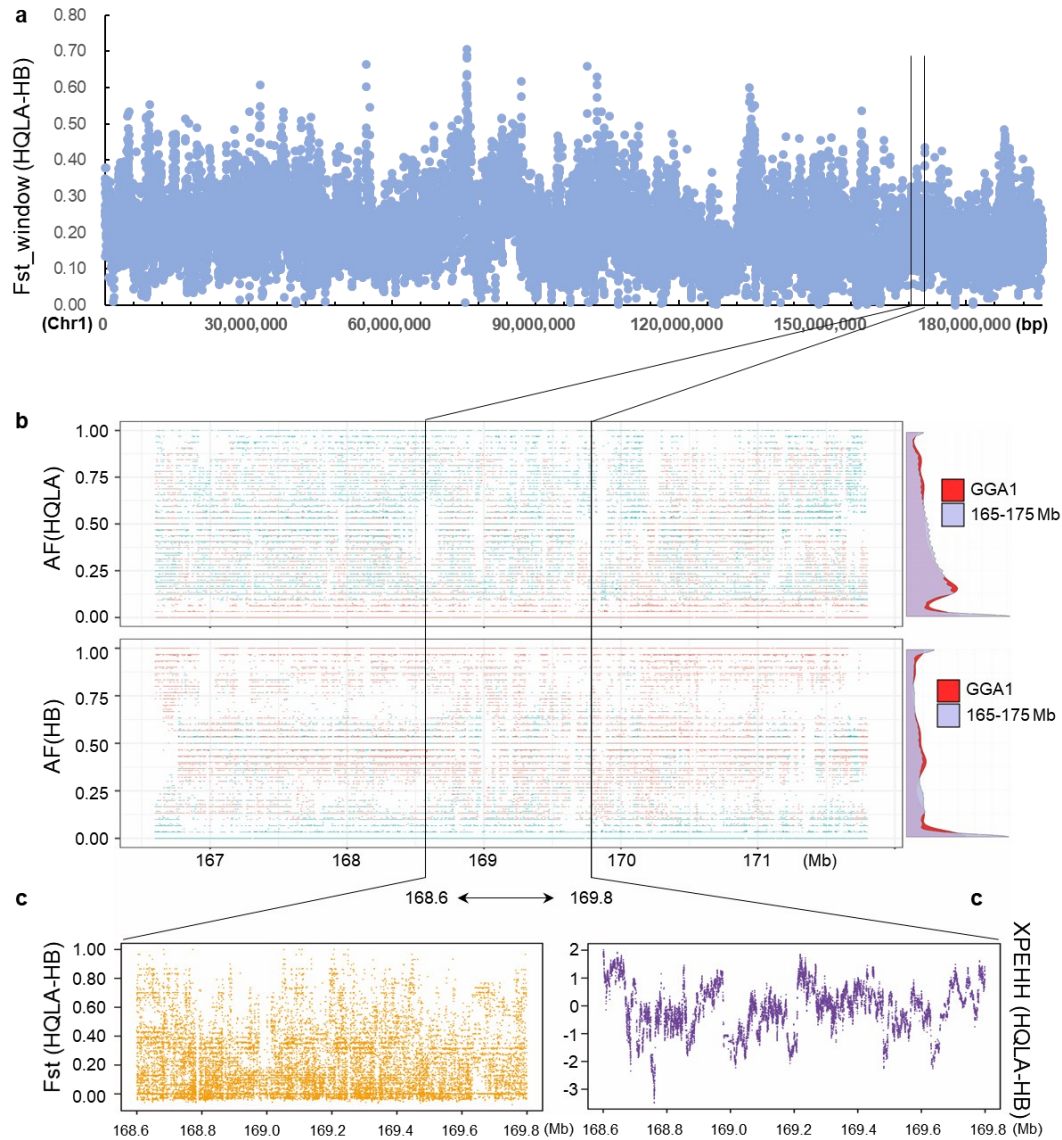

**Supplementary Fig. 6. Mosaic signatures of selection in 1.2 Mb region. (a)**  $F_{st}$  estimates between HQLA and HB on chromosome 1 in bins of 20 Kbp. **(b)** Allele frequency spectrum in the HQLA and HB stocks. SNPs with higher frequency in HQLA/HB are plotted in green/ orange, respectively. Density curves in red represent statistics on the entire GGA1 and gray blue in represent statistics on the GGA1: 165-175 Mb interval. **(c)**  $F_{st}$  estimates on a per-site basis and **(c)** normalized XPEHH value between HQLA and HB. Scatter plots represent the fine-mapped 1.2 Mb interval (169.6-169.8 Mb).

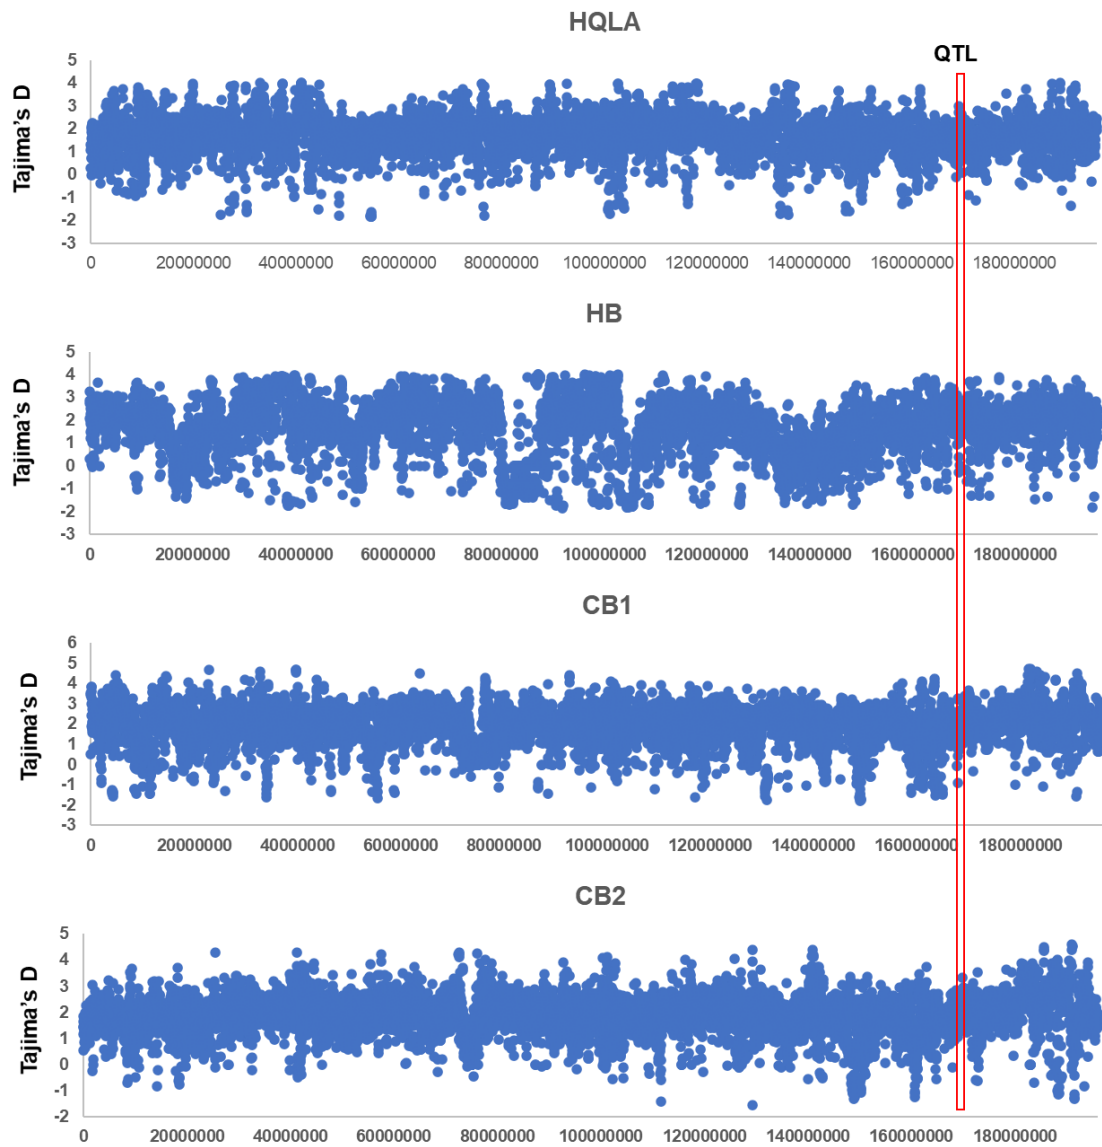

**Supplementary Fig. 7. Tajima's D statistic in HQLA, HB, CB1, CB2 stocks on chromosome 1. Tajima's D statistic was calculated in bins with 25 Kbp.**



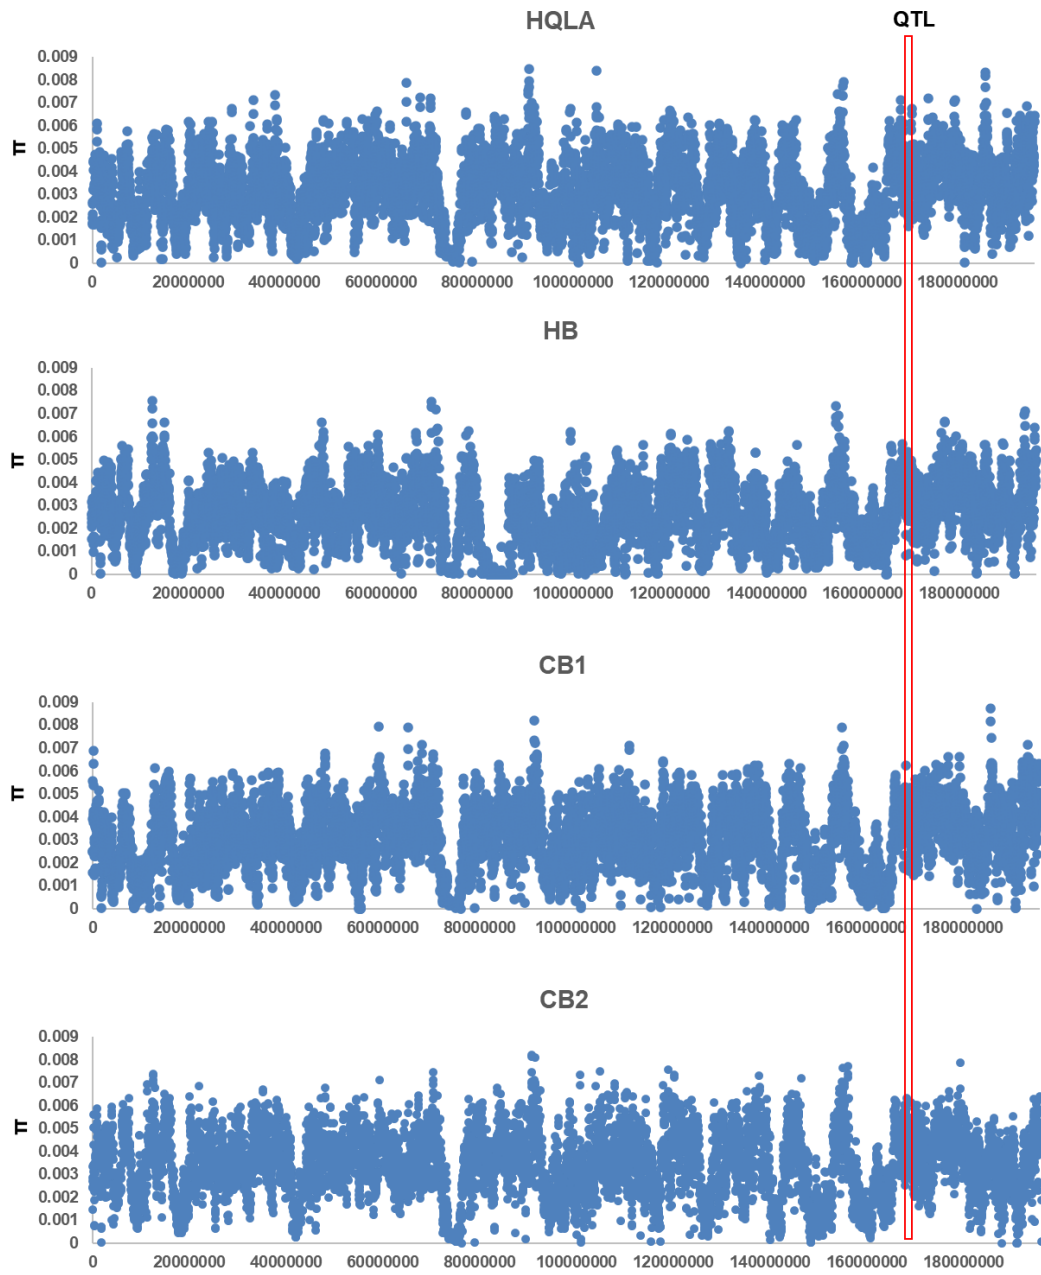

**Supplementary Fig. 8. Nucleotide diversity ( $\pi$ ) in HQLA, HB, CB1, CB2 stocks on chromosome 1.** Nucleotide diversity ( $\pi$ ) were measured in windows of 500 bp and a step size of 25 Kbp.

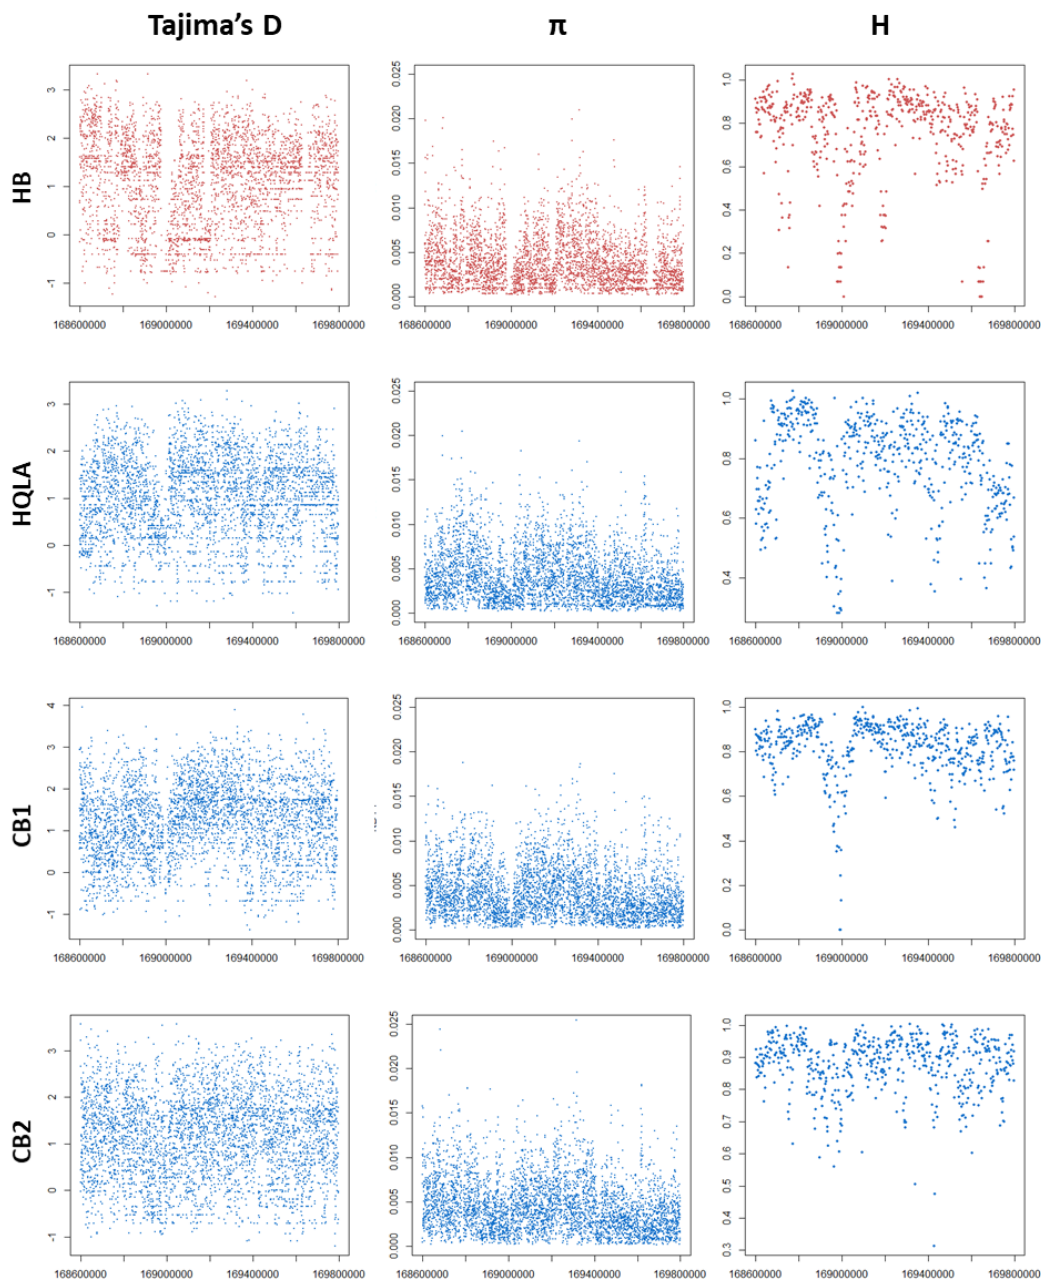

**Supplementary Fig. 9. Genetic diversity in four chicken stocks across the fine-mapped 1.2 Mb region on Chromosome 1.** Illustration of three measures of the genetic diversity (Tajima's D,  $\pi$  and haplotype diversity (H)) in the founders for the deep intercross (HB, HQLA) and two high-weight broiler breeds (CB1, CB2). The scatter plots represent the 1.2 Mb fine-mapped interval on GGA1 (168.6-169.8 Mb). Tajima's D statistic was calculated in bins with 250 bp. Nucleotide diversity ( $\pi$ ) were measured in windows of 500 bp and a step size of 250 bp. The H statistic was calculated in bins of 2 Kbp.

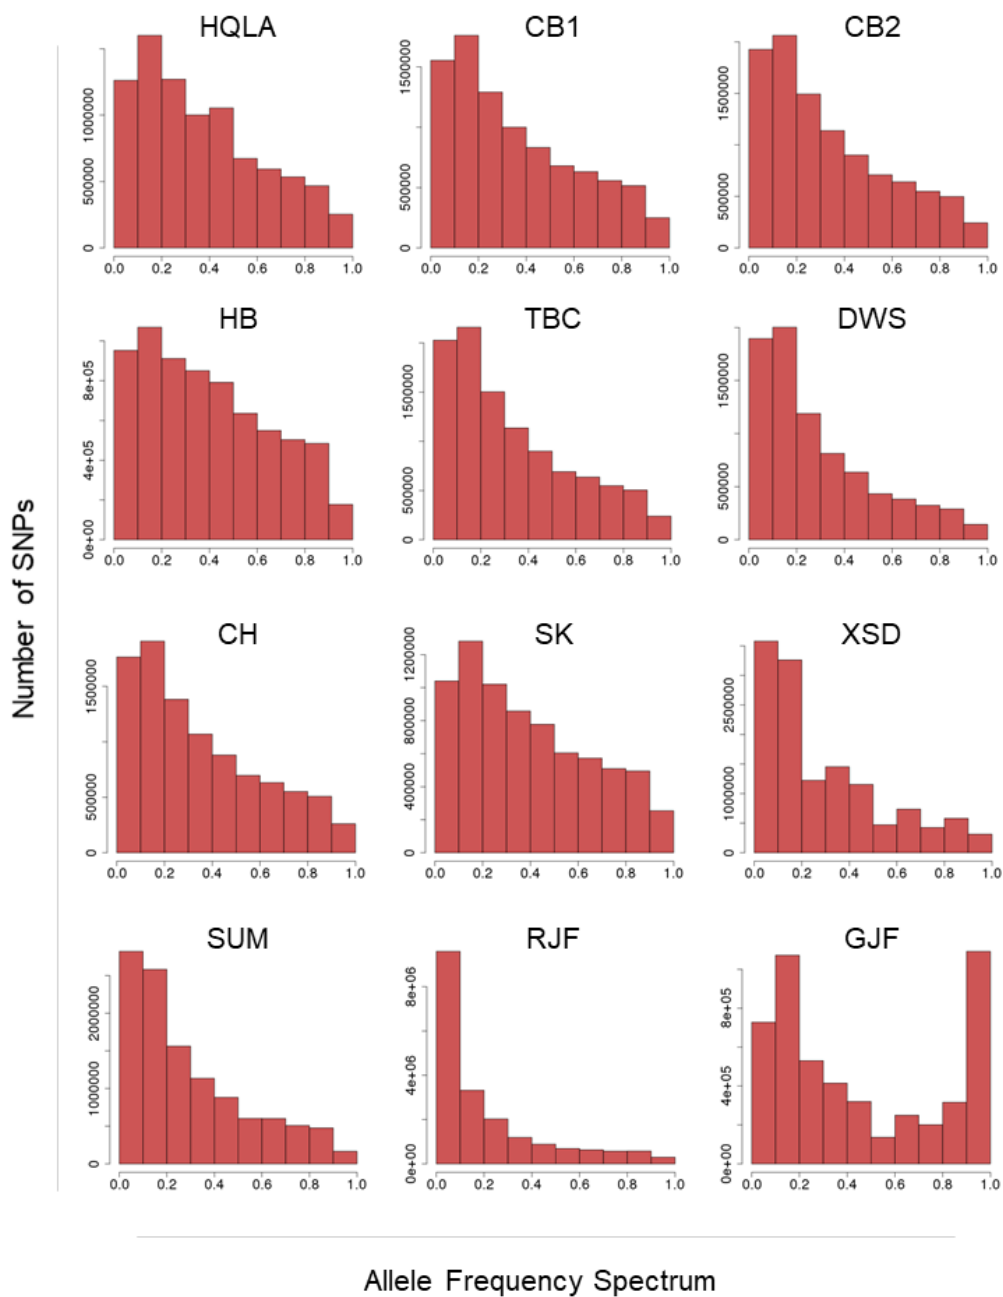

**Supplementary Fig. 10. The genome-wide allele frequency spectrum across the 12 analyzed chicken breeds.** The x-axis denotes the allele frequency-bins (steps of 0.1) and the y-axis the number of SNPs discovered by whole genome re-sequencing in each bin. HQLA: High quality line A03; CB1: Cornish; CB2: Recessive white Rock; HB: Huiyang Bearded chicken; TBC: Tibetan chicken; DWS: Daweishan Mini chicken; CH: Chahua chicken; SK: Silkies; XSD: Xishuangbanna Game chicken; SUM: Sumatera and Kedu Hitam; RJF: Red jungle fowl; GJF: Green jungle fowl.

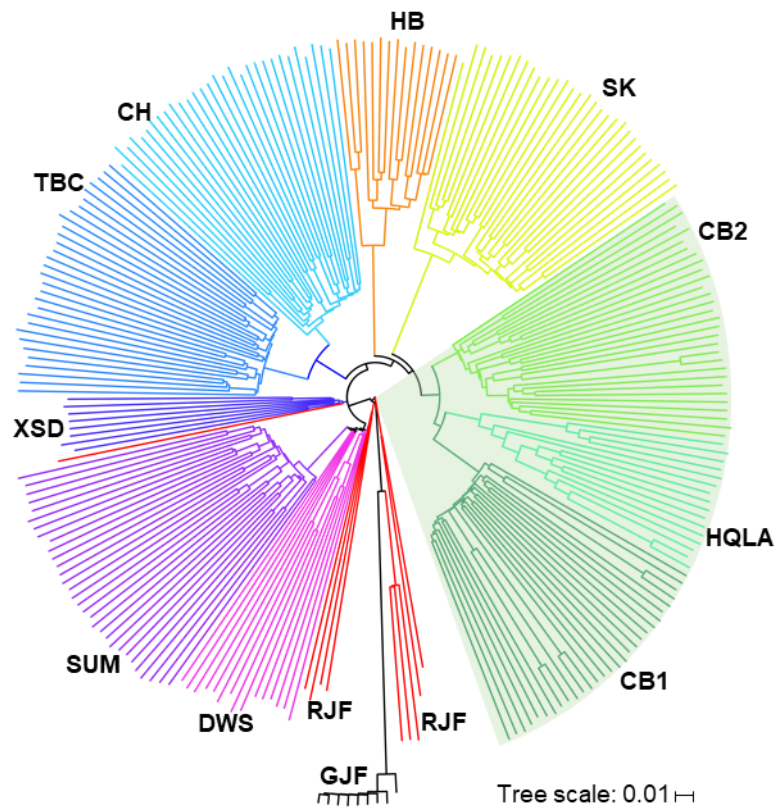

**Supplementary Fig. 11. Neighbor Joining (NJ) cladogram of all 253 samples.**

Neighbor Joining (NJ) cladogram based on independent-pairwise genome-wide SNPs. Taxa represent the 253 samples assessed in this study, with fill color corresponding to population membership. HQLA: High quality line A03; CB1: Cornish; CB2: Recessive white Rock; HB: Huiyang Bearded chicken; TBC: Tibetan chicken; DWS: Daweishan Mini chicken; CH: Chahua chicken; SK: Silkies; XSD: Xishuangbanna Game chicken; SUM: Sumatera and Kedu Hitam; RJF: Red jungle fowl; GJF: Green jungle fowl.

|    | Q1    | Q2    | Q3    | Q4    | Q5    | Q6    | Q7    | Q8    | Q9    |
|----|-------|-------|-------|-------|-------|-------|-------|-------|-------|
| Q1 | 0.47  | 0.49  | -0.16 | -0.04 | 0.20  | 0.10  | -0.07 | -0.01 | 0.06  |
| Q2 | 0.202 | 0.42  | -0.18 | 0.07  | 0.12  | -0.03 | 0.06  | -0.04 | 0.11  |
| Q3 | 0.01  | 0.016 | 0.75  | 0.01  | -0.09 | -0.18 | 0.14  | -0.14 | -0.26 |
| Q4 | 0.002 | 0.003 | 6E-05 | 0.51  | 0.29  | 0.12  | 0.18  | 0.09  | 0.13  |
| Q5 | 0.032 | 0.015 | 0.004 | 0.06  | 0.420 | 0.18  | 0.03  | 0.11  | 0.84  |
| Q6 | 0.008 | 5E-04 | 0.008 | 0.011 | 0.020 | 0.55  | 0.44  | 0.33  | 0.26  |
| Q7 | 0.003 | 0.003 | 0.005 | 0.023 | 9E-04 | 0.116 | 0.43  | 0.41  | 0.32  |
| Q8 | 5E-05 | 1E-03 | 0.009 | 0.007 | 0.011 | 0.072 | 0.153 | 0.45  | 0.70  |
| Q9 | 0.002 | 0.006 | 0.015 | 0.011 | 0.330 | 0.056 | 0.051 | 0.254 | 0.61  |

**Supplementary Fig. 12. Illustration of the pairwise linkage disequilibrium (LD) of Q1-Q9 across 150 sequenced chromosomes in 75 high-weight (broiler) samples.** The diagonal and lower/upper triangles give the haplotype frequencies of the segments Q1-Q9, pairwise D' values and pairwise  $r^2$  values, respectively.

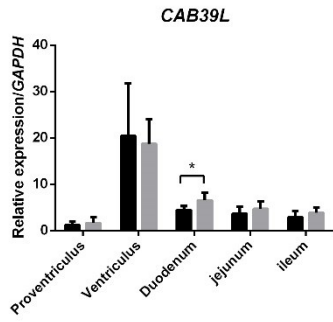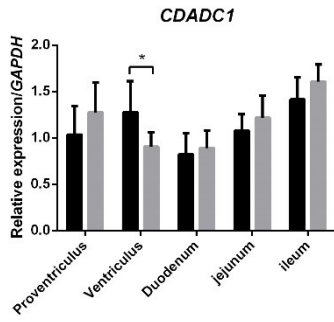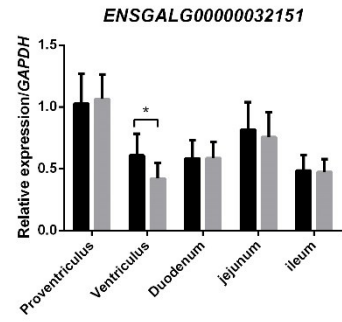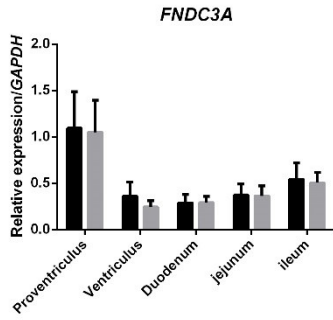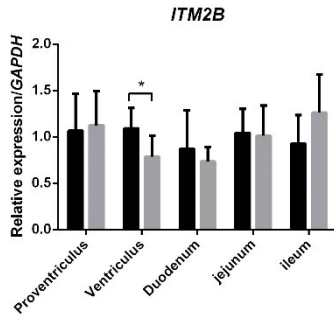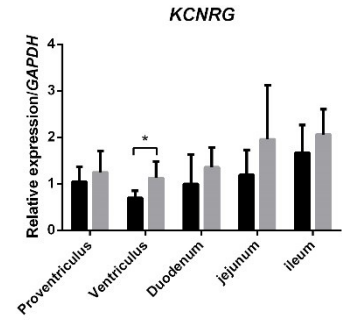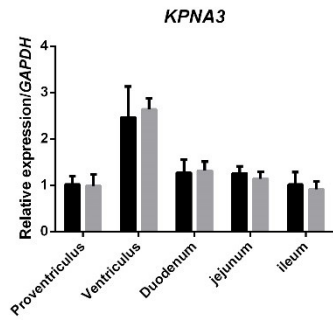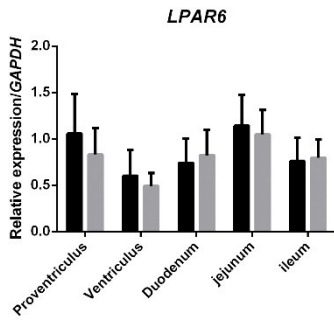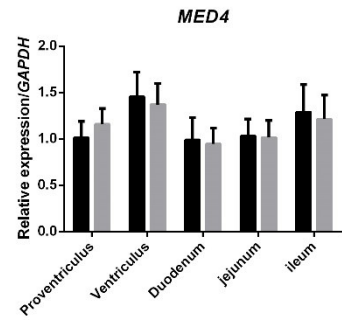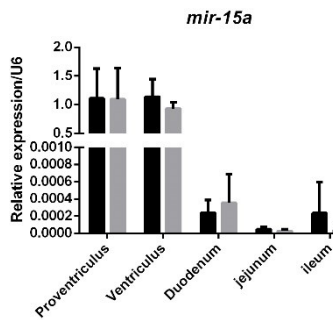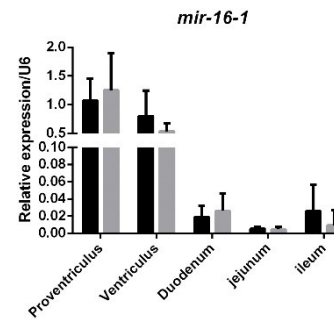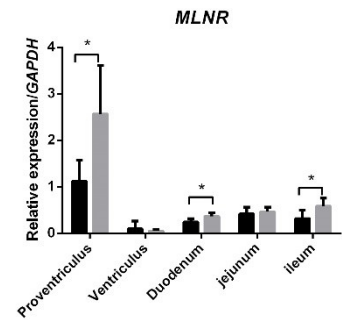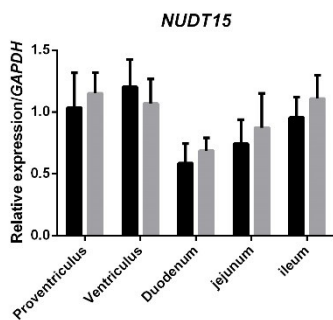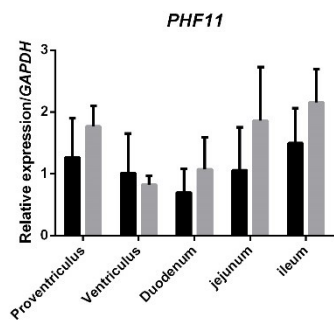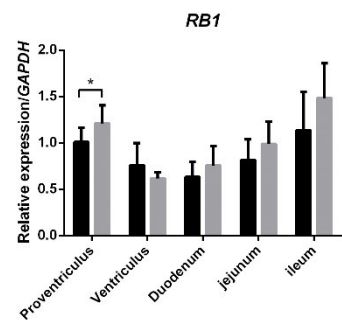

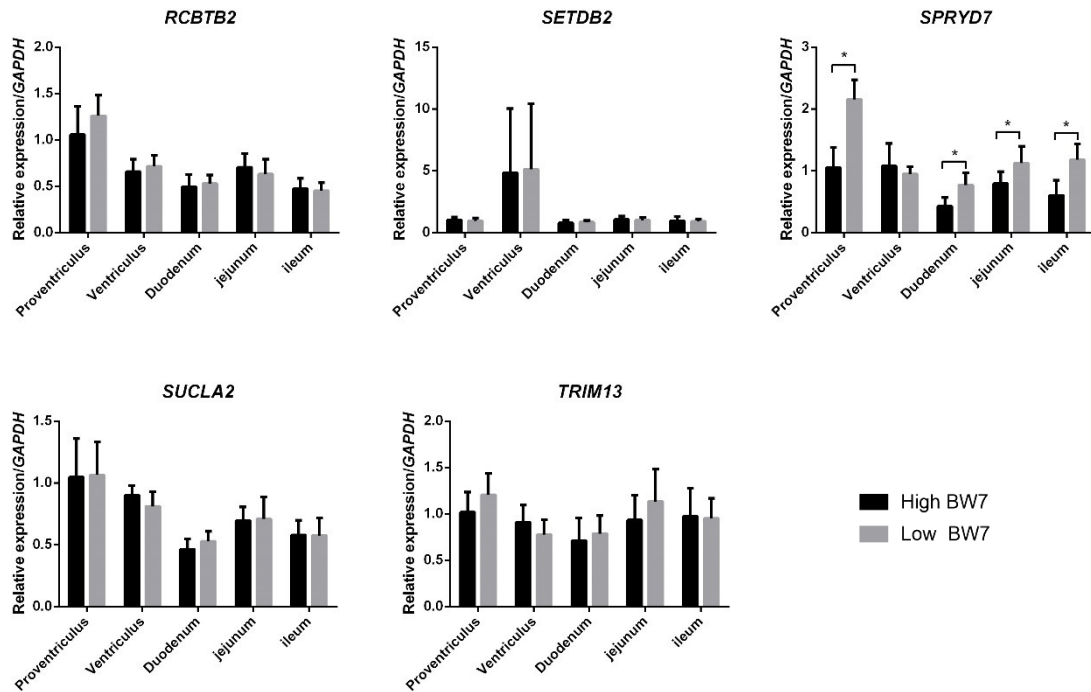

**Supplementary Fig. 13. Results from the gene expression analyses of candidate genes within the QTL region.** Samples were high and low 7-week body-weight chickens from the F<sub>15</sub> generation of the deep intercross across multiple tissues. The data are presented as the means  $\pm$  Std Error. Stars represent  $p < 0.05$  that were estimated by Student's t-test.

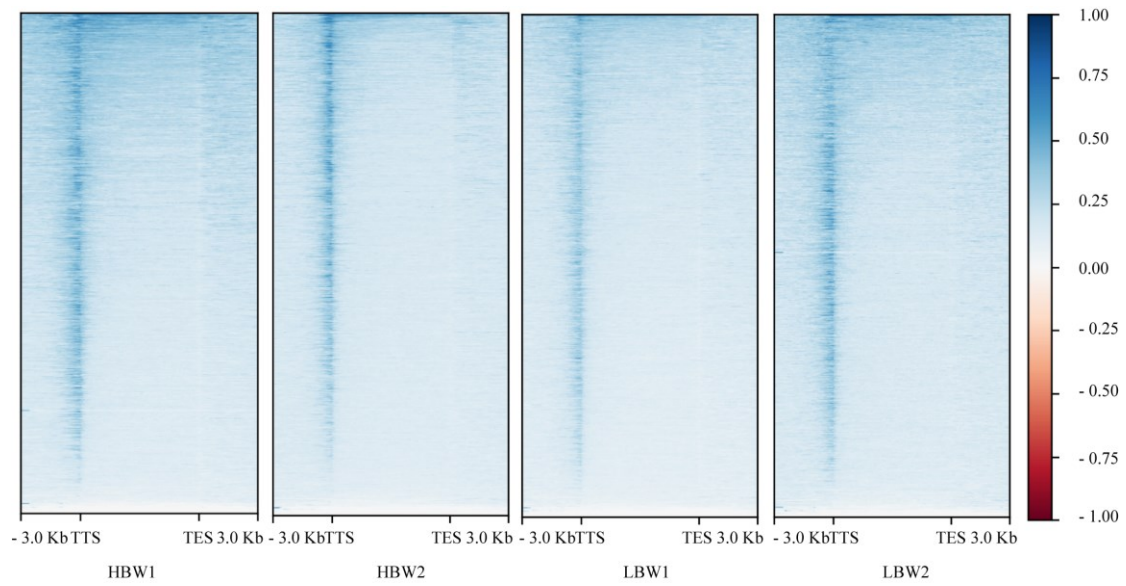

**Supplementary Fig. 14. Peak distribution from the ATAC sequencing near coding regions.** A characteristic enrichment near gene transcriptional start sites (TSS) for all samples.



**Supplementary Table 1 Descriptive statistics for the HQLA-HB AIL pedigree**

| <b>Generation</b> | <b>Nb of animals</b> | <b>Nb of males contributing to the next generation</b> | <b>Nb of females contributing to the next generation</b> | <b>Average body weight at 49 days of age (g) ± SE</b> | <b>Average body weight at 56 days of age (g) ± SE</b> |
|-------------------|----------------------|--------------------------------------------------------|----------------------------------------------------------|-------------------------------------------------------|-------------------------------------------------------|
| <b>F0-HB</b>      | 196                  | 4                                                      | 12                                                       | —                                                     | 545.26±5.48                                           |
| <b>F0-HQLA</b>    | 156                  | 4                                                      | 12                                                       | —                                                     | 1751.99±16.05                                         |
| <b>F1</b>         | 414                  | 8                                                      | 48                                                       | —                                                     | 1106.94± 7.75                                         |
| <b>F2</b>         | 1627                 | 72                                                     | 72                                                       | 954.52±5.56                                           | 1239.47± 7.15                                         |
| <b>F3</b>         | 655                  | 98                                                     | 98                                                       | 849.19±4.19                                           | —                                                     |
| <b>F4</b>         | 1163                 | 99                                                     | 179                                                      | 924.73±4.14                                           | —                                                     |
| <b>F5</b>         | 1131                 | 99                                                     | 175                                                      | 791.95±9.79                                           | —                                                     |
| <b>F6</b>         | 1165                 | 99                                                     | 195                                                      | 832.14±3.96                                           | —                                                     |
| <b>F7</b>         | 1605                 | 101                                                    | 186                                                      | 951.97±3.77                                           | —                                                     |
| <b>F8</b>         | 1274                 | 95                                                     | 95                                                       | 992.33±4.46                                           | —                                                     |
| <b>F9</b>         | 1314                 | —                                                      | —                                                        | 966.68±7.17                                           | 1144.20±7.78                                          |

**Supplementary Table 2 Descriptive statistics of the phenotypes for F<sub>9</sub> individuals**

| <b>Traits</b> | <b>n</b> | <b>mean</b> | <b>sd</b> | <b>min</b> | <b>max</b> |
|---------------|----------|-------------|-----------|------------|------------|
| <b>BW0</b>    | 587      | 30.17       | 2.85      | 21.5       | 39.8       |
| <b>BW2</b>    | 589      | 166.63      | 17.98     | 99.6       | 219.3      |
| <b>BW4</b>    | 585      | 433.93      | 58.79     | 246.5      | 630.5      |
| <b>GR0-4</b>  | 579      | 403.86      | 58.26     | 215.1      | 596.9      |
| <b>BW6</b>    | 599      | 775.54      | 118.59    | 315        | 1199       |
| <b>BW8</b>    | 598      | 1147.7      | 185.55    | 662        | 1855.2     |
| <b>GR4-8</b>  | 584      | 714.04      | 141.26    | 205        | 1258.3     |
| <b>BW10</b>   | 598      | 1510.34     | 272.44    | 760        | 2419       |
| <b>BW12</b>   | 598      | 1895.33     | 365.81    | 936        | 3094.5     |
| <b>GR8-12</b> | 597      | 747.11      | 204.32    | 110.1      | 1436       |
| <b>BW14</b>   | 588      | 2090.48     | 398.21    | 1079       | 3127.5     |
| <b>DW</b>     | 579      | 1789.54     | 348.56    | 866.3      | 2711.4     |
| <b>AFW</b>    | 577      | 73.12       | 32.05     | 0.01       | 226.35     |
| <b>EW</b>     | 575      | 1400.41     | 287.39    | 641        | 2158       |
| <b>LI</b>     | 569      | 114.62      | 12        | 82         | 165        |
| <b>TG</b>     | 254      | 24.09       | 22.09     | 0          | 98         |
| <b>CHOL</b>   | 265      | 130.69      | 22.27     | 74         | 185        |
| <b>LDH</b>    | 263      | 769.08      | 340.6     | 336        | 1729       |

**Supplementary Table 3 Summary of the F<sub>2</sub> GWAS results for all the studied traits**

| <b>Traits</b> | <b>Nb of SNP<br/>(1% significance)</b> | <b>Nb of SNP<br/>(5% significance)</b> | <b>peakSNP</b> | <b>Chr.</b> | <b>Location</b> | <b>P value</b> |
|---------------|----------------------------------------|----------------------------------------|----------------|-------------|-----------------|----------------|
| <b>BW2</b>    | 0                                      | 0                                      | rs13974906     | 1           | 171,778,431     | 4.81E-06       |
| <b>BW4</b>    | 6                                      | 16                                     | rs13974906     | 1           | 171,778,431     | 1.92E-09       |
| <b>BW6</b>    | 11                                     | 18                                     | GGaluGA055431  | 1           | 170,802,565     | 1.95E-09       |
| <b>BW8</b>    | 15                                     | 25                                     | GGaluGA055630  | 1           | 171,387,660     | 2.07E-09       |
| <b>BW10</b>   | 24                                     | 33                                     | GGaluGA055630  | 1           | 171,387,660     | 1.21E-10       |
| <b>BW12</b>   | 15                                     | 27                                     | GGaluGA054960  | 1           | 169,679,782     | 3.16E-09       |
| <b>BW13</b>   | 13                                     | 13                                     | GGaluGA055630  | 1           | 171,387,660     | 1.46E-08       |
| <b>DW</b>     | 0                                      | 0                                      | rs15243919     | 27          | 4,875,779       | 0.000176822    |
| <b>AFW</b>    | 0                                      | 0                                      | rs13972243     | 1           | 169,578,430     | 1.53E-05       |
| <b>EW</b>     | 0                                      | 0                                      | rs14120230     | 19          | 4,927,473       | 6.96E-05       |
| <b>SW</b>     | 52                                     | 70                                     | rs14917305     | 1           | 169,795,686     | 1.61E-18       |
| <b>IL</b>     | 2                                      | 2                                      | GGaluGA054496  | 1           | 168,446,325     | 5.96E-07       |
| <b>GR0-4</b>  | 7                                      | 14                                     | rs13974906     | 1           | 171,778,431     | 1.84E-09       |
| <b>GR4-8</b>  | 10                                     | 17                                     | GGaluGA054970  | 1           | 169,695,275     | 1.13E-08       |
| <b>GR8-12</b> | 1                                      | 7                                      | rs15501372     | 1           | 170,616,617     | 1.80E-07       |

**Supplementary Table 4 Summary of the F<sub>2</sub> GWAS results for all the studied traits**

| <b>Traits</b> | <b>Nb of SNP (1% significance)</b> | <b>Nb of SNP (5% significance)</b> | <b>peakSNP</b> | <b>Chr.</b> | <b>Location</b> | <b>P value</b> |
|---------------|------------------------------------|------------------------------------|----------------|-------------|-----------------|----------------|
| <b>BW2</b>    | 10                                 | 26                                 | S1_168536487   | 1           | 169,241,142     | 3.84E-12       |
| <b>BW4</b>    | 47                                 | 69                                 | S1_168536487   | 1           | 169,241,142     | 6.05E-16       |
| <b>BW6</b>    | 30                                 | 54                                 | S1_168536487   | 1           | 169,241,142     | 1.16E-15       |
| <b>BW8</b>    | 54                                 | 86                                 | S1_168536487   | 1           | 169,241,142     | 3.38E-16       |
| <b>BW10</b>   | 23                                 | 39                                 | S1_168536487   | 1           | 169,241,142     | 2.81E-14       |
| <b>BW12</b>   | 8                                  | 17                                 | S1_168536487   | 1           | 169,241,142     | 6.29E-13       |
| <b>BW14</b>   | 4                                  | 8                                  | S1_168536487   | 1           | 169,241,142     | 3.67E-12       |
| <b>DW</b>     | 0                                  | 0                                  | S4_19243419    | 4           | 19,926,211      | 6.43E-06       |
| <b>AFW</b>    | 0                                  | 0                                  | S25_992356     | 25          | 1,028,439       | 2.59E-05       |
| <b>EW</b>     | 0                                  | 0                                  | S4_19243419    | 19          | 19,926,211      | 2.16E-06       |
| <b>IL</b>     | 4                                  | 9                                  | S1_168536487   | 1           | 169,241,142     | 5.26E-12       |
| <b>GR0-4</b>  | 42                                 | 67                                 | S1_168536487   | 1           | 169,241,142     | 7.89E-16       |
| <b>GR4-8</b>  | 15                                 | 30                                 | S1_168536487   | 1           | 169,241,142     | 7.04E-12       |
| <b>GR8-12</b> | 0                                  | 0                                  | S3_16954182    | 3           | 17,624,830      | 4.93E-05       |
| <b>CHO</b>    | 0                                  | 0                                  | S6_32970253    | 6           | 33,486,374      | 3.28E-05       |
| <b>TG</b>     | 0                                  | 0                                  | S3_103616838   | 3           | 104,414,933     | 7.16E-06       |
| <b>LDH</b>    | 0                                  | 0                                  | S23_4544444    | 23          | 4,607,157       | 1.41E-05       |

**Supplementary Table 5 Detailed various types of mutation in GGA1: 168.6 -171.7 Mb**

| <b>Variation Tpes</b>               | <b>HQLA</b> | <b>HB</b> |
|-------------------------------------|-------------|-----------|
| <b>SNP</b>                          | 39,707      | 32,238    |
| <b>D (delection)</b>                | 1,567       | 1,496     |
| <b>SI (short insertion)</b>         | 1,333       | 1,269     |
| <b>CNV ( copy number variation)</b> | 10          | 11        |
| <b>INV (inversion)</b>              | 8           | 9         |
| <b>TD (tandem duplication)</b>      | 6           | 4         |
| <b>Total</b>                        | 42,631      | 33,632    |

**Supplementary Table 6. Data statistics for the ATAC-seq**

| <b>Sample</b>      | <b>HBW1</b> | <b>HBW2</b> | <b>LBW1</b> | <b>LBW2</b> |
|--------------------|-------------|-------------|-------------|-------------|
| All reads          | 126444264   | 142863910   | 113588079   | 94890795    |
| Mapped             | 124822301   | 140614366   | 112227552   | 93381948    |
| Mapped Rate        | 0.987       | 0.984       | 0.988       | 0.984       |
| Unique Mapped      | 114594307   | 131686138   | 103270285   | 86853094    |
| Unique Mapped Rate | 0.906       | 0.922       | 0.909       | 0.915       |
| All Base           | 13345901288 | 14912254164 | 11059130056 | 11045461751 |
| Mapped Base        | 13263443636 | 14755933973 | 10989247657 | 10918951025 |
| Unique Mapped Base | 12360940179 | 13972887791 | 10242052043 | 10272456790 |
| Peak Number        | 29724       | 21485       | 19514       | 7303        |

**Supplementary Table 7. Peak distribution from the ATAC-seq near coding regions**

| <b>Genome location</b> | <b>HBW1</b> | <b>HBW2</b> | <b>LBW1</b> | <b>LBW2</b> |
|------------------------|-------------|-------------|-------------|-------------|
| <b>Intergenic</b>      | 54.93%      | 53.54%      | 53.02%      | 58.46%      |
| <b>Intron</b>          | 25.62%      | 22.57%      | 21.97%      | 24.95%      |
| <b>Promoter-TSS</b>    | 15.93%      | 21.10%      | 21.05%      | 14.97%      |
| <b>TTS</b>             | 1.90%       | 1.86%       | 2.06%       | 1.01%       |
| <b>Exon</b>            | 1.62%       | 0.93%       | 1.90%       | 0.61%       |

**Supplementary Table 8. Allele frequency of miR-16 mutation for the two breeds used as F0 for the intercross line and 10 populations**

| Cluster          | Breeds    | Size | Type I (freq. ) | Type II (freq. ) |
|------------------|-----------|------|-----------------|------------------|
| High body weight | HQLA (F0) | 15   | 0.37            | 0.63             |
|                  | HQLA      | 25   | 0.44            | 0.56             |
|                  | CB1       | 29   | 0.15            | 0.85             |
|                  | CB2       | 30   | 0.25            | 0.75             |
| Low body weight  | HB (F0)   | 15   | 0.25            | 0.75             |
|                  | HB        | 25   | 0.20            | 0.80             |
|                  | SK        | 30   | 0.02            | 0.98             |
|                  | CH        | 30   | 0.39            | 0.61             |
|                  | TBC       | 30   | 0.45            | 0.55             |
|                  | DWS       | 31   | 0.02            | 0.98             |
|                  | XSD       | 8    | 0.13            | 0.87             |
|                  | SUM       | 15   | 0.08            | 0.92             |



**Supplementary Table 9. Allele frequency of the rs13553102 SNP in 11 chicken breeds**

| Cluster                 | Breeds or lines            | Abbreviation | Allele frequency |      |
|-------------------------|----------------------------|--------------|------------------|------|
|                         |                            |              | A                | G    |
| <b>High body weight</b> | High quality line A03      | HQLA         | 0.78             | 0.21 |
|                         | Cobb500                    | CB1          | 0.51             | 0.48 |
|                         | Recessive white Rock       | CB2          | 0.53             | 0.46 |
| <b>Low body weight</b>  | Huiyang Bearded chicken    | HB           | 0.13             | 0.86 |
|                         | Silkies                    | SK           | 0.31             | 0.68 |
|                         | Chahua chicken             | CH           | 0.25             | 0.75 |
|                         | Tibetan chicken            | TBC          | 0.08             | 0.92 |
|                         | Daweishan Mini chicken     | DWS          | 0.68             | 0.31 |
|                         | Xishuangbanna Game chicken | XSD          | 0.75             | 0.25 |
|                         | Sumatera and Kedu Hitam    | SUM          | 0.53             | 0.46 |
|                         | Red jungle fowl            | RJF          | 0.05             | 0.95 |

**Supplementary Table 10 Primers used for validation of differentially expressed genes**

| Primer                     | Sequence               |
|----------------------------|------------------------|
| <i>SUCLA2-F</i>            | CATGGGTTTCAGGTGCAACA   |
| <i>SUCLA2-R</i>            | GAACAGAAATGCCAGCCTCC   |
| <i>NUDT15-F</i>            | CTGAAGGGGTACACAGGGAG   |
| <i>NUDT15-R</i>            | CGACCCGTCCTTTTGATTCC   |
| <i>MED4-F</i>              | GTAATGCTGTTTGTGCCCT    |
| <i>MED4-R</i>              | CATCCCCTGGTAAGTGTCCA   |
| <i>ITM2B-F</i>             | ATCCTGCTGACATCGTCCAT   |
| <i>ITM2B-R</i>             | CCGGCCTTGATGTTGATGAG   |
| <i>RB1-F</i>               | ACAGTAGTACCCGCTGAGGA   |
| <i>RB1-R</i>               | GTGCCGTTTGTGGAGGTTTC   |
| <i>LPAR6-F</i>             | ATGGTATTTGTCCTCGGCCT   |
| <i>LPAR6-F</i>             | ATGTACGTCGTGGTCTCGTT   |
| <i>ENSGALG0000032151-F</i> | TTTCGTTTGCATGCACTTTC   |
| <i>ENSGALG0000032151-R</i> | GTCCCACAAGAGGGTTTCAA   |
| <i>RCBTB2-F</i>            | CCTGGATGTGATGGCATTGG   |
| <i>RCBTB2-R</i>            | AGTGCCAAGGAAAGTGCATG   |
| <i>FNDC3A-F</i>            | TTAACAGCCTTGAGCAGGA    |
| <i>FNDC3A-R</i>            | TCCCCACTTCAGCTTGAGAG   |
| <i>MLNR-F</i>              | CCAGGACCTACACAGAGACC   |
| <i>MLNR-R</i>              | TGGCAGATGTCCACCTTTCT   |
| <i>CDADC1-F</i>            | TTTGGTGAAGTGGAGGGTGT   |
| <i>CDADC1-R</i>            | TGGTGCTGCTGGTCATCTAT   |
| <i>CAB39L-F</i>            | GTCTGCAGTTGTTCTTGCCA   |
| <i>CAB39L-R</i>            | GCCTTGCTCCATTGTCAAA    |
| <i>SETDB2-F</i>            | TGAAGGCATTTTGGACGCAA   |
| <i>SETDB2-R</i>            | TTCGTTACCAATGCCAAG     |
| <i>PHF11-F</i>             | GGACAGGACTATCAGCAGCT   |
| <i>PHF11-R</i>             | GATGCAGACAGAGAAGTGGC   |
| <i>RCBTB1-F</i>            | AGGGCGTTACTCCTGTTCAA   |
| <i>RCBTB1-R</i>            | CGCCATGGAATGATGAGAGC   |
| <i>ARL11-F</i>             | TCCACACTGCTATCCTGGTG   |
| <i>ARL11-R</i>             | TCACATCATCCATTGGCATT   |
| <i>KPNA3-F</i>             | GCCAGCATTGTGTGTTCTCA   |
| <i>KPNA3-R</i>             | TGGTGAAGTCCAGAAAGGGAAC |
| <i>ENSGALG0000029963-F</i> | CTGAAGCCAGCGAACTACC    |
| <i>ENSGALG0000029963-R</i> | TCCCTTCCAGACACACTTCC   |
| <i>SPRYD7-F</i>            | GGGATGTCCATAGCCTGGTG   |
| <i>SPRYD7-R</i>            | GCTGTTGGCTGGTAGTCTGT   |
| <i>TRIM13-F</i>            | TGGCGACCATACAAAGCATG   |
| <i>TRIM13-R</i>            | TTCCAAGGTATCCAGCCGAG   |

|                       |                             |
|-----------------------|-----------------------------|
| <i>KCNRG-F</i>        | AGTGTGGAACCGACTGCTCT        |
| <i>KCNRG-R</i>        | GAGGCGAAATCCATCTTTGA        |
| <i>GAPDH-F</i>        | CGATCTGAACTACATGGTTTACATGTT |
| <i>GAPDH-R</i>        | CCCGTTCTCAGCCTTGACA         |
| <i>gga-mir-15a-F</i>  | GCGTAGCAGCACATAATGGT        |
| <i>gga-mir-16-1-F</i> | GCGAGTATTAAGTGTGCTGCTG      |
| <i>gga-U6-F</i>       | CGATACAGAGAAGATTAGCATGG     |

---
