# Supplementary material for: Multiple ancestral haplotypes harboring regulatory mutations cumulatively contribute to a QTL affecting chicken growth traits
Source: PubMed Central journal article supplement (PMC7455696; doi:10.1038/s42003-020-01199-3), 2020-08-28
Supplement: 42003_2020_1199_MOESM2_ESM.pdf [file 42003_2020_1199_MOESM2_ESM.pdf]

## Description of Additional Supplementary Files

**File Name:** Supplementary Data

**Description** the source data file
